# Supplementary material
Source: MDPI journal article supplement (https://www.mdpi.com/2076-3263/8/2/45)
Supplement: s1 [file s1]

## Sheet: Sheet1
Authors of the Article	Title of the Article	Journal	Year of Publication	Location of the Study	Waterbodies Considered	Biophysical Aspects related to Ecosystem Services	Blue and green Water Considerations	How Hydrology was considered?	Modelling / Measurements Spatial Resolution	Modelling / Measurements Temporal Resolution	Hydrological Spatial Scale for Analysis of Ecosystem Services	Hydrological Temporal Scale for Analysis of Ecosystem Services	Characteristics of the Hydrograph used for Analysis of Ecosystem Services
BEAULIEU, J. J., GOLDEN, H. E., KNIGHTES, C. D., MAYER, P. M., KAUSHAL, S. S., PENNINO, M. J., ARANGO, C. P., BALZ, D. A., ELONEN, C. M., FRITZ, K. M. & HILL, B. H.	Urban Stream Burial Increases Watershed-Scale Nitrate Export	Plos One, 10.	2015	USA, Cincinnati, Ohio and Baltimore, Maryland	River	Quality	Blue	Quantitative Measured	Whole Stream	Unknown	Whole Stream	Unknown	Mean Discharge
BOUGHTON, D. A. & PIKE, A. S.	Floodplain Rehabilitation as a Hedge against Hydroclimatic Uncertainty in a Migration Corridor of Threatened Steelhead	Conservation Biology, 27, 1158-1168.	2013	USA, Pajaro River in central California	Floodplain, River	Ecology	Blue	Quantitative Modelled	Sub-Catchment	Hourly	Whole Stream	Hourly	Flow Suitability Window
BOUSKA, K. L., WHITLEDGE, G. W. & LANT, C.	Development and evaluation of species distribution models for fourteen native central US fish species	Hydrobiologia, 747, 159-176.	2015	USA, 12 central states AR, IL, IA, KS, LA, MN, MS, MO, NE, ND, SD, and WI	Basin, River	Ecology	Blue	Quantitative Measured	Sub-Stream	Unknown	Sub-Stream	Unknown	Flow Variability
BRYAN, B. A., HIGGINS, A., OVERTON, I. C., HOLLAND, K., LESTER, R. E., KING, D., NOLAN, M., MACDONALD, D. H., CONNOR, J. D., BJORNSSON, T. & KIRBY, M.	Ecohydrological and socioeconomic integration for the operational management of environmental flows	Ecological Applications, 23, 999-1016.	2013	Australia	Basin, River	Ecology	Blue	Quantitative Modelled	Unknown	Daily	Whole Stream	Monthly	Flow Variability
CABELLO, V., WILLAARTS, B. A., AGUILAR, M. & DEL MORAL ITUARTE, L.	River basins as social-ecological systems: linking levels of societal and ecosystem water metabolism in a semiarid watershed	Ecology and Society, 20.	2015	Spain, Almeria	Basin	Quantity	Blue & Green	Quantitative Modelled	HRU	Monthly	Per Land Cover Type	Annual	Water Budget
CATFORD, J. A., NAIMAN, R. J., CHAMBERS, L. E., ROBERTS, J., DOUGLAS, M. & DAVIES, P.	Predicting Novel Riparian Ecosystems in a Changing Climate	Ecosystems, 16, 382-400.	2013	Australia	Flooplain, River	Ecology	Blue	Qualitative	Whole Stream	Seasonal	Whole Stream	Seasonal	Mean Discharge
CLUER, B. & THORNE, C.	A STREAM EVOLUTION MODEL INTEGRATING HABITAT AND ECOSYSTEM BENEFITS	River Research and Applications, 30, 135-154.	2014	Theoretical	River	Ecology	Blue	Qualitative	Whole Stream	Seasonal	Whole Stream	Unknown	Flow Variability
DILE, Y. T., KARLBERG, L., DAGGUPATI, P., SRINIVASAN, R., WIBERG, D. & ROCKSTROM, J.	Assessing the implications of water harvesting intensification on upstream-downstream ecosystem services: A case study in the Lake Tana basin	Science of the Total Environment, 542, 22-35.	2016	Ethiopia, Blue Nile	Basin, Lake	Quantity,Quality,Ecology	Blue & Green	Quantitative Modelled	HRU	Daily	Per HRU	Daily	Minimum Flow Requirements
EROL, A. & RANDHIR, T. O.	Watershed ecosystem modeling of land-use impacts on water quality	Ecological Modelling, 270, 54-63.	2013	Turkey	Basin, Lake	Quantity,Quality	Blue & Green	Quantitative Modelled	Grid-Cell	Daily	Whole Basin	Monthly	Water Budget
FAN, M., SHIBATA, H. & WANG, Q.	Optimal conservation planning of multiple hydrological ecosystem services under land use and climate changes in Teshio river watershed, northernmost of Japan	Ecological Indicators, 62, 1-13.	2016	Japan	Basin	Quantity,Quality	Blue	Quantitative Modelled	HRU	Daily	Per HRU	Annual	Total Discharge
FAY, P. A., GUNTENSPERGEN, G. R., OLKER, J. H. & JOHNSON, W. C.	Climate change impacts on freshwater wetland hydrology and vegetation cover cycling along a regional aridity gradient	Ecosphere, 7.	2016	Canada, USA (Saskatchewan, Manitoba, and Alberta), (Minnesota, Iowa, North and South Dakota, and Montana)	Wetland	Ecology	Green	Quantitative Modelled	Whole Wetland	10-day	Whole Wetland	10-day	Minimum Flow Requirements
GLAVAN, M., PINTAR, M. & VOLK, M.	Land use change in a 200-year period and its effect on blue and green water flow in two Slovenian Mediterranean catchments-lessons for the future	Hydrological Processes, 27, 3964-3980.	2013	Slovenia	Basin	Quantity	Blue & Green	Quantitative Modelled	HRU	Daily	Per Sub-Basin	Annual	Water Budget
HAVENS, K. E. & STEINMAN, A. D.	Ecological Responses of a Large Shallow Lake (Okeechobee, Florida) to Climate Change and Potential Future Hydrologic Regimes	Environmental Management, 55, 763-775.	2015	USA, Florida	Basin, River, Lake	Ecology	Blue	Quantitative Modelled	Grid-Cell	Daily	Whole Basin	Daily	Flow Variability
JOHNSON, A. C., ACREMAN, M. C., DUNBAR, M. J., FEIST, S. W., GIACOMELLO, A. M., GOZLAN, R. E., HINSLEY, S. A., IBBOTSON, A. T., JARVIE, H. P., JONES, J. I., LONGSHAW, M., MABERLY, S. C., MARSH, T. J., NEAL, C., NEWMAN, J. R., NUNN, M. A., PICKUP, R. W., REYNARD, N. S., SULLIVAN, C. A., SUMPTER, J. P. & WILLIAMS, R. J.	The British river of the future: How climate change and human activity might affect two contrasting river ecosystems in England	Science of the Total Environment, 407, 4787-4798.	2009	UK (Thames and Yorkshire Ouse)	Basin, River	Quality,Ecology	Blue	Quantitative Modelled	Grid-Cell	Daily	Whole Basin	Daily	Flow Variability
JOHNSTON, J. M., MCGARVEY, D. J., BARBER, M. C., LANIAK, G., BABENDREIER, J., PARMAR, R., WOLFE, K., KRAEMER, S. R., CYTERSKI, M., KNIGHTES, C., RASHLEIGH, B., SUAREZ, L. & AMBROSE, R.	An integrated modeling framework for performing environmental assessments: Application to ecosystem services in the Albemarle-Pamlico basins (NC and VA, USA)	Ecological Modelling, 222, 2471-2484.	2011	USA, NC and VA	Basin	Quantity,Quality,Ecology	Blue	Quantitative Modelled	HRU	Daily	Per Sub-Basin	Annual	Total Discharge
JUJNOVSKY, J., MARGARITA GONZALEZ-MARTINEZ, T., ARTURO CANTORAL-URIZA, E. & ALMEIDA-LENERO, L.	Assessment of Water Supply as an Ecosystem Service in a Rural-Urban Watershed in Southwestern Mexico City	Environmental Management, 49, 690-702.	2012	Mexico (Mexico city)	Basin	Quantity	Blue	Quantitative Modelled	HRU	Daily	Per HRU	Annual	Water Budget
KAGGWA, R. C., VAN DAM, A. A., KIPKEMBOI, J. & DENNY, P.	Evaluation of nitrogen cycling and fish production in seasonal ponds ('Fingerponds') in Lake Victoria wetlands, East Africa using a dynamic simulation model	Aquaculture Research, 42, 74-90.	2010	Uganda, Kenya (Lake Victoria)	Wetland	Quality,Ecology	Blue	Quantitative Modelled	Unknown	Daily	Whole Lake	Daily	Minimum Flow Requirements
KAISER, B. A.	Watershed Conservation in the Long Run	Ecosystems, 17, 698-719.	2014	USA, Hawaii	Basin	Quantity	Blue	Quantitative Modelled	Grid-Cell	Unknown	Whole Basin	Annual	Water Budget
KARABULUT, A., EGOH, B. N., LANZANOVA, D., GRIZZETTI, B., BIDOGLIO, G., PAGLIERO, L., BOURAOUI, F., ALOE, A., REYNAUD, A., MAES, J., VANDECASTEELE, I. & MUBAREKA, S.	Mapping water provisioning services to support the ecosystem-water-food-energy nexus in the Danube river basin	Ecosystem Services, 17, 278-292.	2016	Europe, Danube	Basin	Quantity	Blue & Green	Quantitative Modelled	HRU	Daily	Per HRU	Annual	Minimum Flow Requirements
KAUFFMAN, S., DROOGERS, P., HUNINK, J., MWANIKI, B., MUCHENA, F., GICHERU, P., BINDRABAN, P., ONDURU, D., CLEVERINGA, R. & BOUMA, J.	Green Water Credits - exploring its potential to enhance ecosystem services by reducing soil erosion in the Upper Tana basin, Kenya	International Journal of Biodiversity Science Ecosystem Services & Management, 10, 133-143.	2014	Kenya	Basin	Quantity,Quality	Blue & Green	Quantitative Modelled	HRU	Daily	Per HRU	Annual	Water Budget
LAIZE, C. L. R., ACREMAN, M. C., SCHNEIDER, C., DUNBAR, M. J., HOUGHTON-CARR, H. A., FLOERKE, M. & HANNAH, D. M.	PROJECTED FLOW ALTERATION AND ECOLOGICAL RISK FOR PAN-EUROPEAN RIVERS	River Research and Applications, 30, 299-314.	2014	Europe, Pan-european	Basin	Quantity,Ecology	Blue	Quantitative Modelled	Sub-Stream	Daily	Per Grid-Cell	Daily	Flow Variability
LANDUYT, D., LEMMENS, P., D'HONDT, R., BROEKX, S., LIEKENS, I., DE BIE, T., DECLERCK, S. A. J., DE MEESTER, L. & GOETHALS, P. L. M.	An ecosystem service approach to support integrated pond management: A case study using Bayesian belief networks - Highlighting opportunities and risks	Journal of Environmental Management, 145, 79-87.	2014	Belgium	Lake (ponds)	Quality,Ecology	Blue	Qualitative	Whole Lake	Annual	Whole Lake	Annual	Mean Discharge
LU, Z., WEI, Y., XIAO, H., ZOU, S., REN, J. & LYLE, C.	Trade-offs between midstream agricultural production and downstream ecological sustainability in the Heihe River basin in the past half century	Agricultural Water Management, 152, 233-242.	2015	China	Basin	Quantity,Ecology	Blue & Green	Quantitative Modelled	Unknown	Unknown	Whole Basin	Annual	Water Budget
NELSON, K. C., PALMER, M. A., PIZZUTO, J. E., MOGLEN, G. E., ANGERMEIER, P. L., HILDERBRAND, R. H., DETTINGER, M. & HAYHOE, K.	Forecasting the combined effects of urbanization and climate change on stream ecosystems: from impacts to management options	Journal of Applied Ecology, 46, 154-163.	2009	USA, Maryland	Basin	Quantity,Ecology	Blue	Quantitative Modelled	Sub-Catchment	Daily	Whole Stream	Daily	Flow Variability
PANDEYA, B. & MULLIGAN, M.	Modelling crop evapotranspiration and potential impacts on future water availability in the Indo-Gangetic Basin	Agricultural Water Management, 129, 163-172.	2013	Nepal, India, Pakistan, Bangladesh ,Tibet and Afghanistan	Basin	Quantity	Green	Quantitative Modelled	Grid-Cell	Monthly	Per Administrative Region	Annual	Water Budget
PELLICER-MARTINEZ, F. & MIGUEL MARTINEZ-PAZ, J.	Grey water footprint assessment at the river basin level: Accounting method and case study in the Segura River Basin, Spain	Ecological Indicators, 60, 1173-1183.	2016	Spain, Segura River	Basin	Quality	Blue	Quantitative Modelled	Sub-Catchment	Monthly	Whole Basin	Monthly	Flow Variability
POFF, N. L., BROWN, C. M., GRANTHAM, T., MATTHEWS, J. H., PALMER, M. A., SPENCE, C. M., WILBY, R. L., HAASNOOT, M., MENDOZA, G. F., DOMINIQUE, K. C. & BAEZA, A.	Sustainable water management under future uncertainty with eco-engineering decision scaling	Nature Climate Change, 6, 25-34.	2016	USA, Iowa River	River	Quantity,Ecology	Blue & Green	Quantitative Modelled	Unknown	Daily	Whole Basin	Daily	Water Budget
RODRIGUES, D. B. B., GUPTA, H. V. & MENDIONDO, E. M.	A blue/green water-based accounting framework for assessment of water security	Water Resources Research, 50, 7187-7205.	2014	Brazil, Cachoeira river	Basin	Quantity	Blue & Green	Quantitative Modelled	HRU	Daily	Per Sub-Basin	Monthly	Minimum Flow Requirements
ROY, E. D., MARTIN, J. F., IRWIN, E. G., CONROY, J. D. & CULVER, D. A.	Transient Social-Ecological Stability: the Effects of Invasive Species and Ecosystem Restoration on Nutrient Management Compromise in Lake Erie	Ecology and Society, 15.	2010	Canada, USA (Lake Erie)	River, Lake	Quality,Ecology	Blue	Quantitative Measured	Whole Stream	Daily	Whole Lake	Seasonal	Mean Discharge
ROY, E. D., MARTIN, J. F., IRWIN, E. G., CONROY, J. D. & CULVER, D. A.	Living within dynamic social-ecological freshwater systems: System parameters and the role of ecological engineering	Ecological Engineering, 37, 1661-1672.	2011	Canada, USA (Lake Erie)	River, Lake	Quality,Ecology	Blue	Quantitative Measured	Whole Stream	Daily	Whole Lake	Seasonal	Mean Discharge
SCHLUETER, M., LESLIE, H. & LEVIN, S.	Managing water-use trade-offs in a semi-arid river delta to sustain multiple ecosystem services: a modeling approach	Ecological Research, 24, 491-503.	2009	Tajikistan and Afghanistan	River, lake	Quantity,Ecology	Blue	Quantitative Measured	Whole Stream	Monthly	Whole Basin	Monthly	Flow Variability
TAGUCHI, K. & NAKATA, K.	Evaluation of biological water purification functions of inland lakes using an aquatic ecosystem model	Ecological Modelling, 220, 2255-2271.	2009	Japan	Lake	Quality	Blue	Quantitative Modelled	Unknown	Unknown	Whole Lake	Annual	Water Budget
TIAN, Y., WANG, S., BAI, X., LUO, G. & XU, Y.	Trade-offs among ecosystem services in a typical Karst watershed, SW China	Science of the Total Environment, 566, 1297-1308.	2016	China	Basin	Quantity,Quality,Ecology	Blue & Green	Quantitative Modelled	HRU	Monthly	Per HRU	Annual	Water Budget
VAN DAM, A. A., KIPKEMBOI, J., RAHMAN, M. M. & GETTEL, G. M.	Linking Hydrology, Ecosystem Function, and Livelihood Outcomes in African Papyrus Wetlands Using a Bayesian Network Model	Wetlands, 33, 381-397.	2013	Kenya	Wetland	Quantity,Ecology	Blue & Green	Quantitative Estimated	Whole Wetland	Annual	Whole Wetland	Annual	Total Discharge
WAGNER, I. & ZALEWSKI, M.	Temporal changes in the abiotic/biotic drivers of selfpurification in a temperate river	Ecological Engineering, 94, 275-285.	2016	Poland	River	Quality	Blue	Quantitative Measured	Whole Stream	Daily	Whole Stream	Daily	Total Discharge
WAITE, I. R., KENNEN, J. G., MAY, J. T., CUFFNEY, T. F., JONES, K. A., ORLANDO, J. L. & BROWN, L. R.	Stream Macroinvertebrate Response Models for Bioassessment Metrics: Addressing the Issue of Spatial Scale. Figshare, 1.	Plos One	2014	USA, NorthEast	Basin, River	Ecology	Blue	Quantitative Measured	Sub-Catchment	Daily	Whole Stream	Monthly	Flow Variability
WATANABE, M. D. B. & ORTEGA, E.	Dynamic emergy accounting of water and carbon ecosystem services: A model to simulate the impacts of land-use change	Ecological Modelling, 271, 113-131.	2014	Brazil, Taquarizinho river	Basin	Quantity,Ecology	Blue & Green	Quantitative Modelled	Whole Basin	Daily	Whole Basin	Daily	Water Budget
WEISS, M., SCHALDACH, R., ALCAMO, J. & FLOERKE, M.	Quantifying the Human Appropriation of Fresh Water by African Agriculture	Ecology and Society, 14.	2009	Africa, pan-african	Basin	Quantity	Blue & Green	Quantitative Modelled	Grid-Cell	Daily	Per Grid-Cell	Annual	Water Budget
WILLAARTS, B. A., VOLK, M. & AGUILERA, P. A.	Assessing the ecosystem services supplied by freshwater flows in Mediterranean agroecosystems	Agricultural Water Management, 105, 21-31.	2012	Spain	Basin	Quantity	Blue & Green	Quantitative Modelled	HRU	Monthly	Per Land Cover Type	Annual	Water Budget
XU, X., YANG, G., TAN, Y., ZHUANG, Q., LI, H., WAN, R., SU, W. & ZHANG, J.	Ecological risk assessment of ecosystem services in the Taihu Lake Basin of China from 1985 to 2020	Science of the Total Environment, 554, 7-16.	2016	China	Basin	Quantity,Quality,Ecology	Blue & Green	Quantitative Modelled	Grid-Cell	Daily	Per Grid-Cell	Annual	Water Budget
YATES, D., PURKEY, D., SIEBER, J., HUBER-LEE, A. & GALBRAITH, H.	WEAP21 - A demand-, priority-, and preference-driven water planning model Part 2: Aiding freshwater ecosystem service evaluation	Water International, 30, 501-512.	2005	USA, California, Sacramento River	Basin	Quantity	Blue	Quantitative Modelled	HRU	Monthly	Whole Basin	Monthly	Total Discharge
